1 **Variation at the Klotho gene locus does not affect**  
2 **cognitive function in up to 335,074 British Caucasians**  
3 **in the UK Biobank**

4

5 <sup>1</sup>Hasnat A Amin, BSc; <sup>1</sup>Fotios Drenos, PhD; <sup>1+</sup>Alexandra I Blakemore, PhD

6

7 <sup>1</sup>Department of Life Sciences, College of Health and Life Sciences, Brunel University London,  
8 Kingston Lane, Uxbridge, UB8 3PH

9

10 <sup>+</sup>Corresponding Author:

11

12 Professor Alexandra Blakemore

13

14 Department of Life Sciences

15 College of Health and Life Sciences

16 Brunel University London

17 Kingston Lane

18 Uxbridge

19 UB8 3PH

20

21 +44 (0)1895 268430

22 [alex.blakemore@brunel.ac.uk](mailto:alex.blakemore@brunel.ac.uk)

23

24 **Abstract**

25

26 The proportion of older adults in Western populations is increasing and there is,  
27 therefore, a need to define factors affecting maintenance of physical and  
28 cognitive health in old age. Variations in the Klotho (*KL*) gene, and specifically  
29 the *KL-VS* haplotype, have been identified by several authors as potentially  
30 influencing cognitive function and decline. We have attempted to verify the  
31 reported associations between *KL* variants, including the *KL-VS* haplotype, and  
32 cognitive function in up to 335,074 British Caucasian participants aged 40-79  
33 years from the UK Biobank. We do not find evidence that *KL-VS* affects  
34 cognitive function or its decline with increasing age. We examined a further 244  
35 *KL* variants and found that rs117650866 was associated with Prospective  
36 Memory, but could not replicate this in follow-up samples. In conclusion, there is  
37 insufficient evidence in the UK Biobank to support the concept that *KL* variants  
38 affect cognitive function or its rate of decline.

39

## 40 **Introduction**

41

42 The demographics of Western populations are changing, with an increase in the  
43 proportion of older adults. There is, thus, a need to define the factors affecting  
44 maintenance of physical and cognitive health in old age. Cognition can be  
45 defined as any process that is required for an individual to be aware of their  
46 situation and to use that information to respond to it (1). As individuals get older,  
47 memory, learning and processing speed decline (2); often leading to reduced  
48 independence and increased reliance on families and social care. As life  
49 expectancy increases, it becomes ever more necessary to explore some of the  
50 factors that might explain variation in cognitive function and cognitive decline in  
51 adults.

52

53 Several authors have highlighted variants in the Klotho (*KL*) gene as associated  
54 with ageing. *KL* is located on chromosome 13 in humans, and encodes a single-  
55 pass transmembrane protein that acts as an FGF23 co-receptor (3-5). It was  
56 first identified in mice by Kuro-o *et al.* (6) who showed that decreased *kl*  
57 expression resulted in a condition resembling premature ageing. In humans, *KL*  
58 variants have been reported to be associated with longevity, cardiovascular risk  
59 factors and cancer (7-10).

60

61 In addition, multiple studies have been carried out exploring the relationship  
62 between *KL* variants and cognitive function and decline, mostly focusing on the  
63 *KL-VS* haplotype, which refers to a pair of functional variants that result in  
64 F352V (rs9536314) and C370S (rs9527025) substitutions. Previous evidence

65 has been varied: some authors have suggested that among adults aged 70  
66 years or more, people homozygous for V (valine) at position 352 have poorer  
67 cognitive function (11,12), but also suggests that V352 heterozygotes have  
68 better cognitive function than those who are homozygous for (F) phenylalanine  
69 at position 352 (11,13). On the other hand, Mengel-From *et al.* (14) showed  
70 that, in Danish populations aged between 92-100 years, V352 heterozygotes  
71 had poorer cognition and Almeida *et al.* (15) showed that among men aged 71-  
72 87 years, V352 carriers were more likely to get dementia. De Vries *et al.* (16)  
73 showed that V352 heterozygotes have a slower rate of cognitive decline, but  
74 Porter *et al.* (17) did not find any such relationship in their data.

75

76 In addition to the *KL-VS* haplotype, there are reports of associations between  
77 variants in the *KL* promoter region and cognition. Mengel-From *et al.* (14)  
78 reported that carriers of the rs398655 C allele had better cognitive function than  
79 non-carriers and Hao *et al.* (18) reported that those with who are homozygous  
80 for the G (guanine) allele at G-395A (rs1207568) have an increased risk of  
81 cognitive impairment.

82

83 At present, conflicting reports indicate that, at a population level, the relationship  
84 between the *KL-VS* haplotype and cognitive function or cognitive decline is not  
85 particularly clear: there is, therefore, a need to explore this area further using  
86 significantly bigger sample sizes. Here, we aim to verify the reported  
87 associations between *KL* variants, including the *KL-VS* haplotype, and cognitive  
88 function in up to 335,074 UK Biobank (UKB) participants aged between 40 and  
89 79 years, by carrying out a phenome scan of cognitive measures, including

90 reaction time and various memory tests. We also aim to search for novel  
91 associations between the *KL* genetic variants and cognitive function using the  
92 same approach.

93

## 94 **Subjects and Methods**

95

### 96 Population and study design

97

98 This study was carried out using data from the UK Biobank (UKB). UKB is a  
99 large prospective cohort study that recruited ~502,600 UK residents aged  
100 between 40 and 69 years of age between 2006 and 2010. The participants  
101 provided blood, urine and saliva samples, and underwent various physical  
102 assessments, as well as touchscreen questionnaires and verbal interviews (19).

103

### 104 Phenotypes

105

106 Table 1 summarises the phenotypes relating to cognitive function (referred to as  
107 cognitive measures) that were used for our analyses. For some cognitive  
108 measures, a baseline measurement was carried out (referred to as 'Baseline')  
109 at one of 22 assessment centres as well as 2 follow-up measurements (referred  
110 to as 'Follow-Up 1' and 'Follow-Up 2') for a subset of participants. For Fluid  
111 Intelligence, Pairs Matching and Numeric Memory, an online assessment was  
112 performed in addition to the measurements undertaken at the assessment  
113 centres. For Pairs Matching, there were 3 rounds; the first round had 3 pairs  
114 that the participants needed to match and the second and third rounds had 6.  
115 For Trail Making, only data from the online measurement was available to us.  
116 We did not include participants in the analysis for a given cognitive function test  
117 if they abandoned the test and/or if they completed the test with a pause. Each

118 round/follow-up of each measure was treated as a separate phenotype unless  
119 otherwise stated.

120

### 121 Genotyping and quality control

122

123 488,377 individuals were genotyped for up to 812,428 variants using DNA  
124 extracted from blood samples on either the UK Biobank Axiom array (438,427  
125 participants) and the UK BiLEVE Axiom array (49,950 participants). Variant  
126 quality control metrics were provided by UKB as described previously (20). For  
127 genotyped variants, all variants that did not pass standard quality control checks  
128 carried out by Affymetrix and the Wellcome Trust Centre for Human Genetics  
129 were excluded. Specifically, hypothesis testing was carried out to check for  
130 differences in genotyping due to batch effects, plate effects, sex effects and  
131 array effects as well as any departures from Hardy-Weinberg Equilibrium using  
132 a p-value threshold of  $10^{-12}$ . In addition, variants with a missingness of >1%  
133 and/or a minor allele frequency of <0.01 were also excluded. For imputed  
134 variants, all variants with an INFO score of <0.8 were excluded. The *KL* gene is  
135 located at 13:33590571-33640282 (GRCh37.p13) and 246 variants passed QC  
136 within  $\pm 5$  Kb of *KL*. These were selected for the association analyses.

137

138 Sample quality control metrics were provided by UKB and were generated as  
139 described by Bycroft *et al.* (20). Samples were excluded from the analysis if  
140 they were determined to be outliers for missingness and/or heterozygosity  
141 and/or if they had any sex chromosome aneuploidies as well as if the  
142 genetically inferred sex differed from the reported sex. Samples which did not

143 have a genetically-determined White British ancestry were also excluded. A list  
144 of related individuals was also provided by UK Biobank and one individual from  
145 each related pair was excluded at random.

146

#### 147 Statistical Analyses

148

149 PLINK 2.0 was used to fit an additive linear model between the cognitive  
150 measures and the genotypes in all individuals. This was then repeated for a  
151 subset of individuals who were aged 69 years or more at the time of performing  
152 the cognitive test. Unless otherwise specified, all association analyses (i.e.  
153 additive linear models) were adjusted for the first 4 genetic principal  
154 components (PCs) (UKB Field 22009) and the genotyping chip on which the  
155 participant was genotyped on. The cognitive measures and any quantitative  
156 covariates were standardised to a mean of 0 and a variance of 1 before any  
157 linear modelling was performed.

158

159 Since multiple testing was undertaken, we applied statistical correction for this.  
160 A principal component (PC) analysis showed that 24 PCs represented >90% of  
161 variation in the 28 cognitive measures. To determine the number of  
162 independent variants, all pairs of variants within the locus with  $R^2 > 0.1$  were  
163 listed, one variant from each pair was removed and this process was repeated  
164 until there were no pairs of variants remaining. When this is implemented using  
165 --indep-pairwise 60 kb 1 0.1 in PLINK 2.0, 15 independent variants remain. A p-  
166 value threshold of 0.05 is used and Bonferroni-corrected when necessary for  
167 the appropriate number of independent tests in each case (up to 360



168 independent tests: 15 independent variants and 24 PCs). Supplementary Figure

169 1 summarises the analyses and the threshold used for each of them.

170

171 **Results**

172

173 After QC, there were 335,074 individuals remaining for analysis. A summary of  
174 the sample by phenotype is provided in Table 2.

175

176 Since the 2 variants making up the *KL-VS* haplotype are well-characterised  
177 functional *KL* variants in humans, we investigated whether either of them was  
178 associated with any of the cognitive function measures available. Neither  
179 rs9536314 nor rs9527025 were significantly associated at a p-value threshold of  
180 0.05/24 with any of the cognitive measures when unadjusted (Supplementary  
181 Table 1) and when adjusted for age, age<sup>2</sup> and sex (Figure 1).

182

183 Previous studies have largely concentrated on older individuals: to test whether  
184 these variants exerted their effects only in later life, we repeated the analyses,  
185 but only included individuals who were aged  $\geq 69$  years at the time that they  
186 performed the cognitive test. However, we again found that neither rs9536314  
187 nor rs9527025 were significantly associated at a p-value threshold of 0.05/24  
188 with any of the cognitive measures available (Figure 1 & Supplementary Table  
189 1). It was not possible to increase this age threshold beyond 69 years because  
190 all participants were aged between 40 and 69 years at the time of recruitment.

191

192 Although the associations were not statistically significant, the effect size  
193 appeared to increase when excluding individuals under the age of 69 years. We  
194 therefore repeated the analyses but included a genotype\*age interaction term to  
195 test whether the effect of *KL-VS* variants on the cognitive function measures

196 available changed with age. We found that age does not have a statistically  
197 significant effect on the relationship between *KL-VS* and any of the cognitive  
198 function measures available at a p-value threshold of 0.05/24 adjusting for age,  
199  $age^2$  and sex (Supplementary Table 2).

200

201 We next sought to test whether rs9536314 or rs9527025 were associated with  
202 change in any of the cognitive measures over age. For all measures for which  
203 more than one data point was available per participant (i.e. participants had  
204 performed a given cognitive test on more than one occasion), a rate of change  
205 was calculated for each participant (where the rate of change is the change in  
206 the cognitive measure,  $M2-M1$ , divided by the age difference,  $T2-T1$ , in years:  
207 on average, the difference between two measurements is 8.3 years). We found  
208 that neither rs9536314 nor rs9527025 was significantly associated at a p-value  
209 threshold of 0.05 with a change in any of the available cognitive measures over  
210 age, either when unadjusted or when adjusted for  $age_{T1}$ ,  $age_{T1}^2$  and sex  
211 (Supplementary Table 3).

212

213 We next tested to see if any other *KL* variants were statistically associated at a  
214 p-value threshold of 0.05/360 with any of the available cognitive measures. We  
215 found that rs117650866 was associated with Prospective Memory (UKB Field  
216 4291) adjusting for age,  $age^2$  and sex (referred to as Discovery in Table 3).

217 There were no other significant associations, with or without adjustment for age,  
218  $age^2$  and sex (Supplementary Table 4 & 5); there were also no significant  
219 associations when excluding individuals under the age of 69 years  
220 (Supplementary Table 4 & 5).

221

222 We then attempted to internally replicate the rs117650866 association. To do  
223 this, we repeated the association analysis in participants who performed the  
224 Prospective Memory test only on one occasion (i.e. those participants who  
225 performed the test at either Baseline only, or at Follow Up 1 only, or at Follow  
226 Up 2 only). The rs117650866 association was present in those tested at  
227 Baseline only (beta = 0.112, s.e. = 0.0229, power = 0.92,  $v = 99054$ ), but was  
228 absent ( $p > 0.05$ ) in those tested only at either Follow Up 1 only (beta = -0.059,  
229 s.e. = 0.0794, power = 0.12,  $v = 8179$ ) or at Follow Up 2 only (beta = -0.117,  
230 s.e. = 0.101, power = 0.09,  $v = 5656$ ) (Table 3). Despite the lack of power to  
231 detect the association observed at Baseline, the inconsistent direction of the  
232 effect between Baseline and Follow Up 1 and 2 suggest that the association  
233 observed at Baseline was likely to be a false positive. The power calculations  
234 were carried out using the `pwr.f2.test` function from the `pwr` package in R with `u`  
235 set to 9, `f2` set to 0.000216 and `sig.level` set to 0.05.

236

237 We next sought to test whether any *KL* variants were significantly associated at  
238 a p-value threshold of 0.05/15 with a change in any of the cognitive measures  
239 (for which there are repeat measurements) over age, in the same way that *KL*-  
240 VS was tested. We did not find any significant associations (Supplementary  
241 Table 6).

242

## 243 Discussion

244

245 Previous evidence suggested that *KL-VS* and other *KL* variants are associated  
246 with cognitive function during the later stages of life. Our aim was to explore  
247 these findings in a younger and much larger cohort, namely the UK Biobank.  
248 We did not find evidence of a relationship between *KL-VS* and cognitive  
249 function, nor did we find any evidence that the age of an individual had a  
250 significant effect on this relationship. The association we found between  
251 Prospective Memory and rs117650866 did not replicate consistently, nor is  
252 there any evidence of it in previously published studies, so it is likely to be a  
253 false positive. We also did not find evidence of any other *KL* variants being  
254 associated with cognitive function nor with cognitive decline.

255

256 An important point is that previous studies which have identified relationships  
257 between *KL* variants and cognition use populations that are much older (usually  
258 aged 70 years or more), whereas the population we examined is relatively  
259 young (the larger Baseline samples had a mean age of 57 years). We  
260 attempted to address this limitation by repeating our analyses, but only  
261 including individuals over the age of 69 years; we still did not find associations  
262 probably because only about 1% of this subset in the Online tests are over 75  
263 years of age and no individuals are over 79 years of age. Indeed, whenever  
264 authors report an absence of statistically significant associations between *KL*  
265 variants and cognition, the mean age of the cohorts that they analyse are closer  
266 to the one we analysed. For example, Deary *et al.* (12) examined 2 cohorts and  
267 the cohort who undertook cognitive testing at age of 64 years did not show

268 statistically significant associations between *KL*-VS and cognition. Dubal *et al.*  
269 (13) also did not find an association in one of the 3 cohorts that they analysed,  
270 and the mean age of this cohort was 63 years.

271

272 Deary *et al.* (12) provided evidence suggesting that *KL*-VS may influence  
273 cognitive decline. We did not find any evidence to support this. This may be  
274 because the difference between the repeated measurements available to us  
275 was about 8 years whereas Deary *et al.* compared the cognitive abilities of  
276 individuals first tested when aged 11 years and then at the age of 79 years. It is  
277 also important to note that whilst some authors do report relationships between  
278 *KL*-VS and cognitive decline (12,16), other authors do not find any such  
279 relationship (14,17).

280

281 The UKB dataset, despite the advantage of its size, does have biases. In  
282 particular, the participants are generally healthier than average (21). There is  
283 evidence to suggest that the effect of *KL* variants on cognitive function/decline  
284 may be as a result of affecting the severity of a pre-existing psychopathology  
285 (22,23) and individuals suffering from early dementia, etc. would be either  
286 unlikely or even unable to volunteer to participate.

287

288 In conclusion, there is insufficient evidence in the UK Biobank to support the  
289 concept that *KL* variants affect cognitive function or its rate of decline in British  
290 Caucasian individuals aged between 40 and 79 years. Further follow-up testing  
291 would be required to verify the reported effects of *KL* on cognitive function and  
292 decline that are reported in very elderly individuals.

293

294 **Acknowledgements**

295

296 This study was carried out under UK Biobank application 19968 and we would  
297 like to thank both the UKB participants and the UKB staff. The application was  
298 paid for by Calico LLC (South San Francisco, California, United States). Hasnat  
299 Amin is the recipient of a PhD studentship from the College of Health and Life  
300 Sciences, Brunel University London.

301

302 **Conflicts of interest**

303

304 This study was carried out under UK Biobank application 19968. The  
305 application was paid for by Calico LLC (South San Francisco, California, United  
306 States), who had no role in the interpretation of the data. Hasnat Amin is the  
307 recipient of a PhD studentship from the College of Health and Life Sciences,  
308 Brunel University London. The authors have no other conflicts of interest to  
309 declare.

310

311 **References**

312

313 (1) Hopper L, Brosnan S. Primate Cognition. Nature Education Knowledge  
314 2012;5(8).

315 (2) Tun PA, Lachman ME. Age differences in reaction time and attention in a  
316 national telephone sample of adults: education, sex, and task complexity  
317 matter. Dev Psychol 2008 Sep;44(5):1421-1429.

318 (3) Chen G, Liu Y, Goetz R, Fu L, Jayaraman S, Hu M, et al.  $\alpha$ -Klotho is a non-  
319 enzymatic molecular scaffold for FGF23 hormone signalling. Nature 2018 01  
320 25,;553(7689):461-466.

321 (4) Goetz R, Nakada Y, Hu MC, Kurosu H, Wang L, Nakatani T, et al. Isolated  
322 C-Terminal Tail of FGF23 Alleviates Hypophosphatemia by Inhibiting FGF23-  
323 FGFR-Klotho Complex Formation. Proceedings of the National Academy of  
324 Sciences of the United States of America 2010 Jan 1,;107(1):407-412.

325 (5) Urakawa I, Yamazaki Y, Shimada T, Iijima K, Hasegawa H, Okawa K, et al.  
326 Klotho converts canonical FGF receptor into a specific receptor for FGF23.  
327 Nature 2006 Dec 07,;444(7120):770-774.

328 (6) Kuro-o M, Matsumura Y, Aizawa H, Kawaguchi H, Suga T, Utsugi T, et al.  
329 Mutation of the mouse klotho gene leads to a syndrome resembling ageing.  
330 Nature 1997 Nov 06,;390(6655):45-51.



- 331 (7) Oguro R, Kamide K, Kokubo Y, Shimaoka I, Congrains A, Horio T, et al.  
332 Association of carotid atherosclerosis with genetic polymorphisms of the klotho  
333 gene in patients with hypertension. *Geriatr Gerontol Int* 2010 Oct;10(4):311-318.
- 334 (8) Liu C, Cui W, Wang L, Yan L, Ruan X, Liu Y, et al. Klotho gene  
335 polymorphisms are related to colorectal cancer susceptibility. *International*  
336 *journal of clinical and experimental pathology* 2015;8(6):7446-7449.
- 337 (9) Arking DE, Krebsova A, Macek M, Macek M, Arking A, Mian IS, et al.  
338 Association of human aging with a functional variant of klotho. *Proc Natl Acad*  
339 *Sci U S A* 2002 Jan 22;99(2):856-861.
- 340 (10) Majumdar V, Nagaraja D, Christopher R. Association of the functional KL-  
341 VS variant of Klotho gene with early-onset ischemic stroke. *Biochem Biophys*  
342 *Res Commun* 2010 Dec 17;403(3-4):412-416.
- 343 (11) Yokoyama JS, Sturm VE, Bonham LW, Klein E, Arfanakis K, Yu L, et al.  
344 Variation in longevity gene KLOTHO is associated with greater cortical volumes.  
345 *Ann Clin Transl Neurol* 2015 Mar;2(3):215-230.
- 346 (12) Deary IJ, Harris SE, Fox HC, Hayward C, Wright AF, Starr JM, et al.  
347 KLOTHO genotype and cognitive ability in childhood and old age in the same  
348 individuals. *Neurosci Lett* 2005 Apr 11;378(1):22-27.
- 349 (13) Dubal DB, Yokoyama JS, Zhu L, Broestl L, Worden K, Wang D, et al. Life  
350 extension factor klotho enhances cognition. *Cell Rep* 2014 May 22;7(4):1065-  
351 1076.

- 352 (14) Mengel-From J, Soerensen M, Nygaard M, McGue M, Christensen K,  
353 Christiansen L. Genetic Variants in KLOTTHO Associate With Cognitive Function  
354 in the Oldest Old Group. *J Gerontol A Biol Sci Med Sci* 2016;71(9):1151-1159.
- 355 (15) Almeida OP, Morar B, Hankey GJ, Yeap BB, Golledge J, Jablensky A, et  
356 al. Longevity Klotho gene polymorphism and the risk of dementia in older men.  
357 *Maturitas* 2017 Jul;101:1-5.
- 358 (16) de Vries CF, Staff RT, Harris SE, Chapko D, Williams DS, Reichert P, et al.  
359 Klotho, APOE $\epsilon$ 4, cognitive ability, brain size, atrophy, and survival: a study in  
360 the Aberdeen Birth Cohort of 1936. *Neurobiol Aging* 2017 07;55:91-98.
- 361 (17) Porter T, Burnham SC, Milicic L, Savage G, Maruff P, Lim YY, et al. Klotho  
362 allele status is not associated with A $\beta$  and APOE  $\epsilon$ 4-related cognitive decline in  
363 preclinical Alzheimer's disease. *Neurobiol Aging* 2019 04;76:162-165.
- 364 (18) Hao Q, Ding X, Gao L, Yang M, Dong B. G-395A polymorphism in the  
365 promoter region of the KLOTTHO gene associates with reduced cognitive  
366 impairment among the oldest old. *Age (Dordr)* 2016 Feb;38(1):7.
- 367 (19) Allen N, Sudlow C, Downey P, Peakman T, Danesh J, Elliott P, et al. UK  
368 Biobank: Current status and what it means for epidemiology. *Health Policy and*  
369 *Technology* 2012 September 1,;1(3):123-126.
- 370 (20) Bycroft C, Freeman C, Petkova D, Band G, Elliott LT, Sharp K, et al. The  
371 UK Biobank resource with deep phenotyping and genomic data. *Nature* 2018  
372 Oct 11,;562(7726):203-3.

373 (21) Fry A, Littlejohns TJ, Sudlow C, Doherty N, Allen NE. OP41 The  
374 representativeness of the UK Biobank cohort on a range of sociodemographic,  
375 physical, lifestyle and health-related characteristics. *J Epidemiol Community*  
376 *Health* 2016 /09/01;70(Suppl 1):A2-A26.

377 (22) Morar B, Badcock JC, Phillips M, Almeida OP, Jablensky A. The longevity  
378 gene Klotho is differentially associated with cognition in subtypes of  
379 schizophrenia. *Schizophr Res* 2018 03;193:348-353.

380 (23) Erickson CM, Schultz SA, Oh JM, Darst BF, Ma Y, Norton D, et al.  
381 KLOTTHO heterozygosity attenuates APOE4-related amyloid burden in  
382 preclinical AD. *Neurology* 2019 Apr 16;92(16):e187-e1889.

383

384

385 **Figures**

386

387 Figure 1

388 Standardised beta coefficients with 95% Confidence Intervals when regressing  
389 cognitive measures on rs9536314 and on rs9527025 in the UK Biobank with (All  
390 Participants) and without ( $\geq 69$ ) including participants less than 69 years old and  
391 adjusted for age, age<sup>2</sup> and sex.

392

393 Supplementary Figure 1

394 A breakdown of the analyses carried out in this study. LD = linkage  
395 disequilibrium. PCs = principal components.

396

397 **Tables**

398

399 Table 1

400 A description of the cognitive measures from the UK Biobank used in this study.

401

402 Table 2

403 Demographics of the cohort by phenotype. The distribution of the phenotype is  
404 presented in the original units.

405

406 Table 3

407 Standardised coefficients (beta), standard errors (s.e.), sample sizes (n) and p-  
408 values (p) when regressing cognitive measures on rs117650866 in the UK  
409 Biobank adjusted for age, age<sup>2</sup> and sex in the full baseline sample (Discovery),  
410 and in 3 independent samples (i.e. in participants who were present at baseline  
411 only (Baseline) and in participants who were present at the first follow up only  
412 (Follow Up 1) and in participants who were present at the second follow up only  
413 (Follow Up 2)).

414

415 Supplementary Table 1

416 Standardised coefficients (beta), standard errors (s.e.), sample sizes (n) and p-  
417 values (p) when regressing cognitive measures on rs9536314 and on  
418 rs9527025 in the UK Biobank with (All Participants) and without ( $\geq 69$  years old)  
419 including participants less than 69 years old and not adjusted.

420

421 Supplementary Table 2

422 Standardised coefficients (beta), standard errors (s.e.), sample sizes (n) and p-  
423 values (p) when regressing cognitive measures on rs9536314 and on  
424 rs9527025 in the UK Biobank with a genotype\*age interaction term and  
425 adjusted for age, age<sup>2</sup> and sex.

426

427 Supplementary Table 3

428 Standardised coefficients (beta), standard errors (s.e.), sample sizes (n) and p-  
429 values (p) when regressing the rate of decline of cognitive measures on  
430 rs9536314 and on rs9527025 in the UK Biobank with (Adjusted) and without  
431 (Unadjusted) adjusting for age<sub>T1</sub>, age<sub>T1</sub><sup>2</sup> and sex.

432

433 Supplementary Table 4

434 Standardised coefficients (beta), standard errors (s.e.), sample sizes (n) and p-  
435 values (p) when regressing cognitive measures on 246 *KL* variants in the UK  
436 Biobank with (All Participants) and without (≥69 years old) including participants  
437 less than 69 years old and not adjusted.

438

439 Supplementary Table 5

440 Standardised coefficients (beta), standard errors (s.e.), sample sizes (n) and p-  
441 values (p) when regressing cognitive measures on 246 *KL* variants in the UK  
442 Biobank with (All Participants) and without (≥69 years old) including participants  
443 less than 69 years old and adjusted for age, age<sup>2</sup> and sex.

444

445 Supplementary Table 6

446 Standardised coefficients (beta), standard errors (s.e.), sample sizes (n) and p-  
447 values (p) when regressing the rate of decline of cognitive measures on 246 *KL*  
448 in the UK Biobank with (Adjusted) and without (Unadjusted) adjusting for age<sub>T1</sub>,  
449 age<sub>T1</sub><sup>2</sup> and sex.

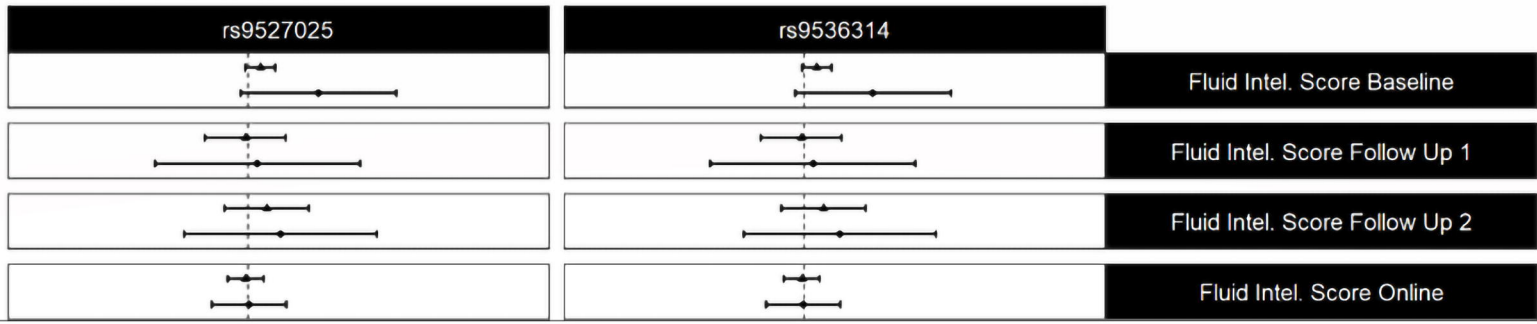

bioRxiv preprint doi: <https://doi.org/10.1101/838409>; this version posted November 19, 2019. The copyright holder for this preprint (which was not certified by peer review) is the author/funder. All rights reserved. No reuse allowed without permission.

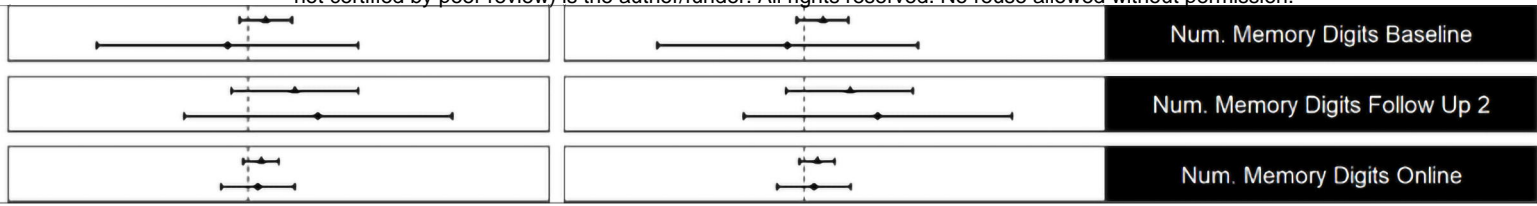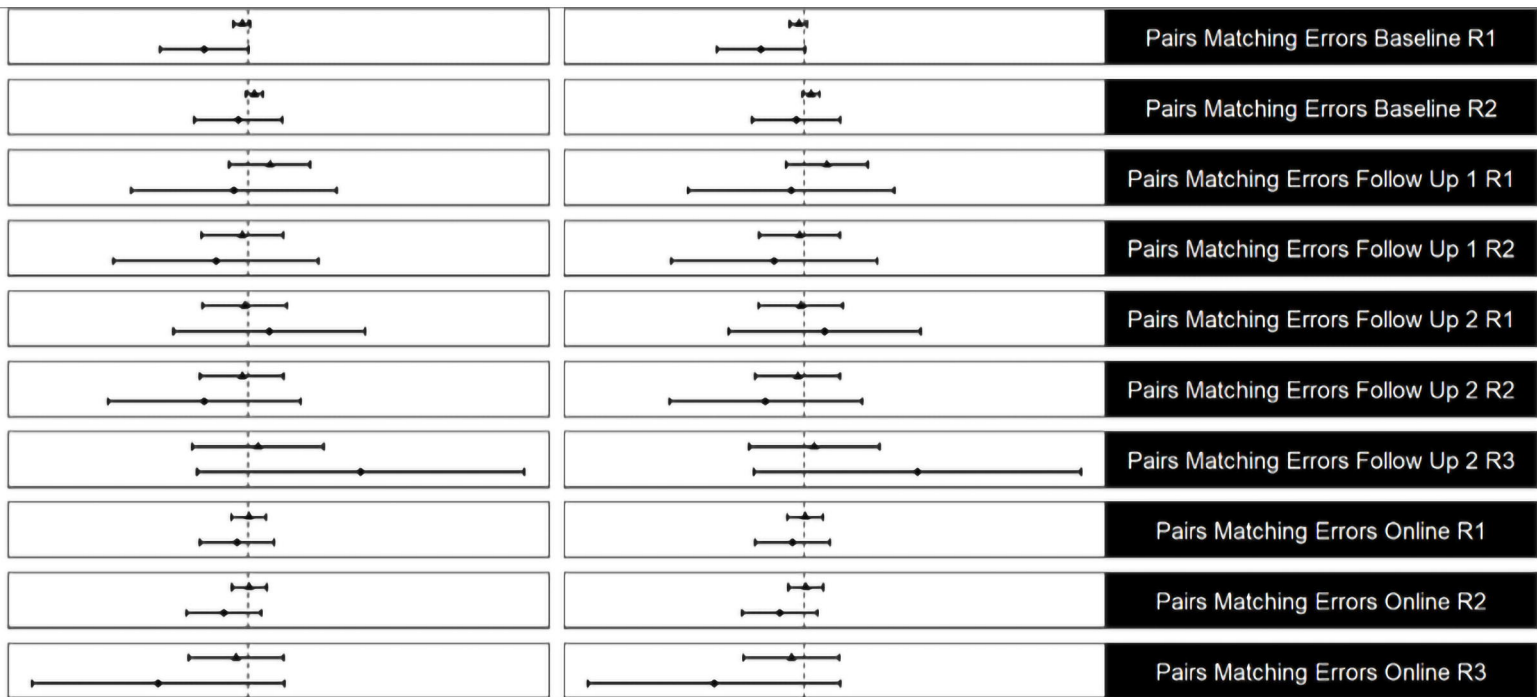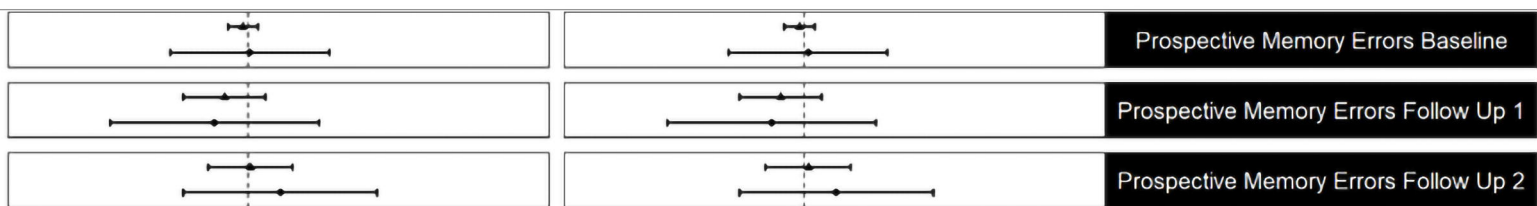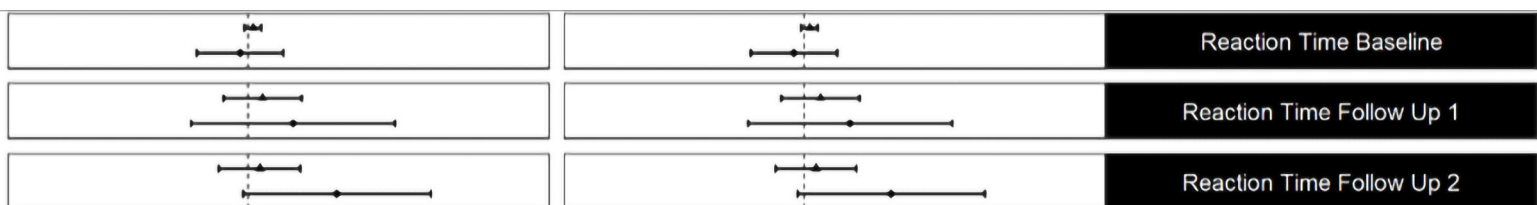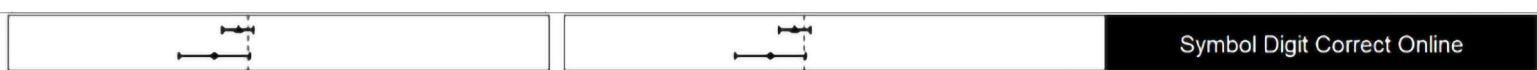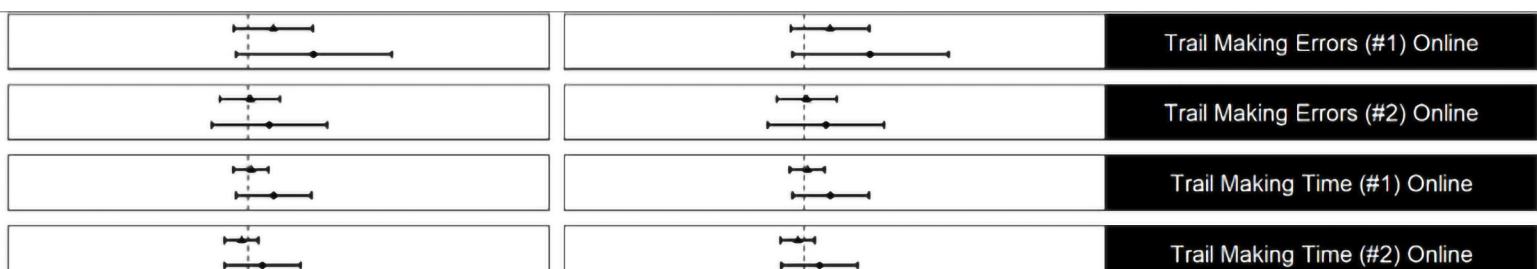

-0.1    0.0    0.1    0.2    beta    -0.1    0.0    0.1    0.2
